# Supplementary material for: Expression of Interneuron Markers in the Dorsolateral Prefrontal Cortex of the Developing Human and in Schizophrenia
Source: Atypon-hosted journal article supplement (doi:10.1176/appi.ajp.2010.09060784), 2010-11-02
Supplement: ajp_167_12_1479_01.pdf [file ajp_167_12_1479_01.pdf]

**TABLE S1. Summary of developmental cohort used for experiments**

| Group                                           | Age (years)   | Gender | PMI (hours)  | pH          | RIN         | #  |
|-------------------------------------------------|---------------|--------|--------------|-------------|-------------|----|
| Samples for microarray analysis                 |               |        |              |             |             |    |
| Neonate                                         | 0.11 – 0.24   | 5 M 2F | 22.7 ± 6.34  | 6.6 ± 0.13  | 8.96 ± 0.32 | 7  |
| Infant                                          | 0.25 – 0.91   | 6M 2F  | 17.63 ± 7.69 | 6.69 ± 0.14 | 8.6 ± 0.65  | 8  |
| Toddler                                         | 1.58 – 4.86   | 3M 3F  | 25.67 ± 9.56 | 6.74 ± 0.17 | 8.18 ± 0.56 | 6  |
| School age                                      | 5.39 – 12.98  | 3M 3F  | 14.67 ± 5.43 | 6.73 ± 0.15 | 8.65 ± 0.40 | 6  |
| Teenage                                         | 15 - 17.82    | 5M 1F  | 16.83 ± 4.71 | 6.79 ± 0.06 | 7.97 ± 1.06 | 6  |
| Young adult                                     | 20.14 – 25.38 | 4M 2F  | 12.0 ± 5.4   | 6.75 ± 0.19 | 9.03 ± 0.35 | 6  |
| Adult                                           | 35.99 – 49.22 | 4M 2F  | 13.83 ± 5.34 | 6.68 ± 0.22 | 8.38 ± 0.33 | 6  |
| Samples for quantitative real time PCR analysis |               |        |              |             |             |    |
| Neonate                                         | 0.11 – 0.24   | 7M 4F  | 22.45 ± 5.11 | 6.6 ± 0.19  | 6.37 ± 1.64 | 11 |
| Infant                                          | 0.25 – 0.91   | 8M 6F  | 16.93 ± 6.4  | 6.58 ± 0.20 | 6.93 ± 1.18 | 14 |
| Toddler                                         | 1.58 – 4.86   | 5M 4F  | 18.67 ± 5.29 | 6.70 ± 0.26 | 6.51 ± 1.21 | 9  |
| School age                                      | 5.39 – 12.98  | 5M 4F  | 15.11 ± 4.68 | 6.63 ± 0.27 | 6.66 ± 1.14 | 9  |
| Teenage                                         | 15 - 17.82    | 6M 2F  | 17.13 ± 4.16 | 6.75 ± 0.09 | 6.34 ± 1.01 | 8  |
| Young adult                                     | 20.14 – 25.38 | 6M 3F  | 13.67 ± 8.26 | 6.67 ± 0.23 | 6.73 ± 0.67 | 9  |
| Adult                                           | 35.99 – 49.22 | 5M 3F  | 13.38 ± 4.60 | 6.60 ± 0.27 | 6.53 ± 0.76 | 8  |
| Samples for Western blot analysis               |               |        |              |             |             |    |
| Neonate                                         | 0.15 – 0.21   | 5M 2F  | 21.0 ± 5.56  | 6.49 ± 0.24 | 6.02 ± 1.99 | 7  |
| Infant                                          | 0.25 – 0.91   | 8M 5F  | 17.0 ± 6.5   | 6.58 ± 0.20 | 6.92 ± 1.22 | 13 |
| Toddler                                         | 1.58 – 4.86   | 5M 3F  | 20.0 ± 4.75  | 6.68 ± 0.26 | 6.4 ± 1.24  | 8  |
| School age                                      | 5.39 – 12.97  | 5M 4F  | 15.0 ± 4.68  | 6.63 ± 0.27 | 6.66 ± 1.14 | 9  |
| Teenage                                         | 15 - 17.82    | 6M 2F  | 17.0 ± 4.16  | 6.75 ± 0.09 | 6.34 ± 1.01 | 8  |
| Young adult                                     | 20.14 – 25.38 | 6M 2F  | 14.0 ± 8.83  | 6.69 ± 0.24 | 6.70 ± 0.71 | 8  |
| Adult                                           | 35.99 – 49.22 | 5M 2F  | 14.0 ± 4.93  | 6.67 ± 0.21 | 6.72 ± 0.60 | 7  |

**TABLE S2. TaqMan gene expression assay details and average efficiency from developmental and control vs schizophrenia cohorts**

| Gene | Gene Name                     | TaqMan Gene Expression Assay | Average Primer Efficiency (%) | Slope |
|------|-------------------------------|------------------------------|-------------------------------|-------|
| PV   | Parvalbumin                   | Hs00161045_m1                | 84                            | -3.79 |
| CCK  | Cholecystokinin               | Hs00174937_m1                | 76                            | -4.09 |
| CB   | Calbindin                     | Hs01077191_g1                | 86                            | -3.73 |
| VIP  | Vasoactive intestinal peptide | Hs00929575_m1                | 88                            | -3.66 |
| SST  | Somatostatin                  | Hs00356144_m1                | 82                            | -3.83 |
| CR   | Calretinin                    | Hs00242372_m1                | 93                            | -3.52 |
| NPY  | Neuropeptide Y                | Hs00173470_m1                | 94                            | -3.48 |

## Supplementary Results

### *Correlation of sample variables with gene expression*

Pearson correlation analysis was performed to determine the effect of age, postmortem interval, pH, and RNA integrity number on interneuron marker mRNA expression in the schizophrenia cohort. Significant negative correlations were found between age and expression of calbindin ( $r=-0.57$ ,  $p=1.99 \times 10^{-7}$ ), vasoactive intestinal peptide ( $r=-0.34$ ,  $p=4.06 \times 10^{-3}$ ), somatostatin ( $r=-0.46$ ,  $p=4.63 \times 10^{-5}$ ) and neuropeptide Y ( $r=-0.30$ ,  $p=9.43 \times 10^{-3}$ ). Tissue pH significantly positively correlated with parvalbumin ( $r=0.28$ ,  $p=0.022$ ), calbindin ( $r=0.38$ ,  $p=9.59 \times 10^{-9}$ ), somatostatin ( $r=0.62$ ,  $p=6.18 \times 10^{-9}$ ), and neuropeptide Y expression ( $r=0.64$ ,  $p=1.36 \times 10^{-9}$ ); while RNA quality, measured by RNA integrity number, was positively correlated to calbindin ( $r=0.54$ ,  $p=7.71 \times 10^{-7}$ ), vasoactive intestinal peptide ( $r=0.36$ ,  $p=1.97 \times 10^{-3}$ ), somatostatin ( $r=0.33$ ,  $p=5.64 \times 10^{-3}$ ) and neuropeptide Y ( $r=0.40$ ,  $p=5.54 \times 10^{-4}$ ). Postmortem interval did not show significant correlation to any of the interneuron marker mRNAs or calretinin protein (Table S3).

**TABLE S3. Statistical analyses of interneuron gene expression in schizophrenia with and without inclusion of group outliers (+/- 2 standard deviations of the mean)**

| Statistics based on all cases                                                  |                           |    |                 |        |                        |    |     |              |    |                 |
|--------------------------------------------------------------------------------|---------------------------|----|-----------------|--------|------------------------|----|-----|--------------|----|-----------------|
|                                                                                | Unpaired t-test (n=74)    |    |                 |        | Variables covaried for |    |     | ANOVA/ANCOVA |    |                 |
|                                                                                | t                         | df | p               | % diff |                        |    |     | F            | df | p               |
| <b>PV</b>                                                                      | 2.03                      | 72 | <b>0.047</b>    | -13.3  |                        | pH |     | 3.6          | 71 | 0.061           |
| <b>CCK</b>                                                                     | 2.56                      | 72 | <b>0.012</b>    | -10.1  | age                    | pH |     | 6.3          | 70 | <b>0.015</b>    |
| <b>CB</b>                                                                      | -1.34                     | 72 | 0.183           | 14.9   | age                    | pH | RIN | 4.5          | 69 | <b>0.038</b>    |
| <b>VIP</b>                                                                     | 2.85                      | 72 | 0.076           | -15.0  | age                    |    | RIN | 3.4          | 70 | 0.071           |
| <b>SST</b>                                                                     | 2.85                      | 72 | <b>0.006</b>    | -24.6  | age                    | pH | RIN | 12.2         | 69 | <b>0.001</b>    |
| <b>CR</b>                                                                      | 1.30                      | 72 | 0.198           | -8.7   |                        |    |     | 1.7          | 72 | 0.198           |
| <b>NPY</b>                                                                     | 1.53                      | 72 | 0.131           | -15.8  | age                    | pH | RIN | 2.1          | 69 | 0.157           |
| Statistics based on all cases with group outliers for individual genes removed |                           |    |                 |        |                        |    |     |              |    |                 |
|                                                                                | Unpaired t-test (n=67-72) |    |                 |        | Variables covaried for |    |     | ANOVA/ANCOVA |    |                 |
|                                                                                | t                         | df | p               | % diff |                        |    |     | F            | df | p               |
| <b>PV</b>                                                                      | 3.20                      | 66 | <b>0.002</b>    | -17.0  |                        | pH |     | 9.2          | 65 | <b>0.0035</b>   |
| <b>CCK</b>                                                                     | 2.40                      | 69 | <b>0.019</b>    | -8.5   |                        |    |     | 5.7          | 69 | <b>0.019</b>    |
| <b>CB</b>                                                                      | -1.36                     | 70 | 0.178           | 12.0   | age                    | pH | RIN | 5.2          | 67 | <b>0.026</b>    |
| <b>VIP</b>                                                                     | 3.10                      | 68 | <b>0.003</b>    | -21.3  | age                    |    | RIN | 9.8          | 66 | <b>0.0026</b>   |
| <b>SST</b>                                                                     | 4.00                      | 69 | <b>0.000143</b> | -31.1  | age                    | pH | RIN | 22.7         | 66 | <b>0.000011</b> |
| <b>CR</b>                                                                      | 2.40                      | 69 | <b>0.021</b>    | -14.1  |                        |    |     | 5.6          | 69 | <b>0.021</b>    |
| <b>NPY</b>                                                                     | 2.10                      | 70 | <b>0.036</b>    | -21.1  | age                    | pH | RIN | 5.3          | 67 | <b>0.024</b>    |

*Effect of clinical characteristics on gene expression in schizophrenia*

Correlations of interneuron marker expression with clinical characteristics and medications showed significant correlations between calbindin and neuropeptide Y mRNA expression and duration of illness ( $r=-0.43$ ,  $p=8.7 \times 10^{-3}$  and  $r=-0.36$ ,  $p=0.035$ , respectively). The significance was lost when partial correlation was performed to account for the correlation to age (calbindin  $r=0.24$ ,  $p=0.165$ ; neuropeptide Y  $r=-0.20$ ,  $p=0.246$ ) (Table S4).

**TABLE S4. Correlation of gene expression with demographic variables in control vs schizophrenia cohort with outliers removed**

|                                     |                               | Age                                     |                                         | pH (PFC)                                |                                         | PMI   |             | RIN          |                                         |
|-------------------------------------|-------------------------------|-----------------------------------------|-----------------------------------------|-----------------------------------------|-----------------------------------------|-------|-------------|--------------|-----------------------------------------|
|                                     |                               | r                                       | p                                       | r                                       | p                                       | r     | p           | r            | p                                       |
| <b>mRNA</b><br>(all cases included) | <b>whole cohort</b>           |                                         |                                         |                                         |                                         |       |             |              |                                         |
|                                     | parvalbumin                   | -0.13                                   | 0.269                                   | <b>0.27</b>                             | <b>0.019</b>                            | -0.07 | 0.560       | 0.17         | 0.156                                   |
|                                     | cholecystokinin               | <b>-0.23</b>                            | <b>0.050</b>                            | <b>0.29</b>                             | <b>0.014</b>                            | 0.12  | 0.318       | -0.02        | 0.858                                   |
|                                     | calbindin                     | <b>-0.61</b>                            | <b><math>9.34 \times 10^{-9}</math></b> | <b>0.36</b>                             | <b><math>1.83 \times 10^{-3}</math></b> | 0.11  | 0.353       | <b>0.49</b>  | <b><math>1.03 \times 10^{-5}</math></b> |
|                                     | vasoactive intestinal peptide | <b>-0.28</b>                            | <b>0.017</b>                            | 0.16                                    | 0.176                                   | -0.04 | 0.723       | <b>0.30</b>  | <b><math>8.46 \times 10^{-3}</math></b> |
|                                     | somatostatin                  | <b>-0.48</b>                            | <b><math>1.49 \times 10^{-5}</math></b> | <b>0.62</b>                             | <b><math>3.41 \times 10^{-9}</math></b> | 0.09  | 0.425       | <b>0.31</b>  | <b><math>7.18 \times 10^{-3}</math></b> |
|                                     | calretinin                    | -0.18                                   | 0.119                                   | -0.10                                   | 0.402                                   | -0.02 | 0.888       | 0.13         | 0.270                                   |
|                                     | neuropeptide Y                | <b>-0.26</b>                            | <b>0.026</b>                            | <b>0.61</b>                             | <b><math>1.02 \times 10^{-8}</math></b> | -0.03 | 0.777       | <b>0.36</b>  | <b><math>1.48 \times 10^{-3}</math></b> |
|                                     | <b>controls</b>               |                                         |                                         |                                         |                                         |       |             |              |                                         |
|                                     | parvalbumin                   | -0.27                                   | 0.101                                   | 0.19                                    | 0.249                                   | -0.05 | 0.778       | 0.01         | 0.976                                   |
| cholecystokinin                     | <b>-0.41</b>                  | <b>0.011</b>                            | 0.21                                    | 0.209                                   | 0.11                                    | 0.515 | -0.22       | 0.190        |                                         |
| calbindin                           | <b>-0.72</b>                  | <b><math>6.08 \times 10^{-7}</math></b> | 0.28                                    | 0.098                                   | 0.08                                    | 0.630 | <b>0.41</b> | <b>0.012</b> |                                         |
| vasoactive intestinal peptide       | <b>-0.33</b>                  | <b>0.044</b>                            | -0.02                                   | 0.921                                   | -0.06                                   | 0.732 | 0.22        | 0.185        |                                         |
| somatostatin                        | <b>-0.62</b>                  | <b><math>3.73 \times 10^{-5}</math></b> | <b>0.63</b>                             | <b><math>2.54 \times 10^{-5}</math></b> | 0.15                                    | 0.366 | 0.19        | 0.260        |                                         |
| calretinin                          | -0.21                         | 0.203                                   | -0.22                                   | 0.186                                   | -0.21                                   | 0.206 | 0.09        | 0.598        |                                         |
| neuropeptide Y                      | -0.27                         | 0.103                                   | <b>0.63</b>                             | <b><math>3.37 \times 10^{-5}</math></b> | 0.04                                    | 0.794 | 0.22        | 0.193        |                                         |

| <b>schizophrenics</b>                       |                               |              |                               |             |                               |       |       |             |                               |
|---------------------------------------------|-------------------------------|--------------|-------------------------------|-------------|-------------------------------|-------|-------|-------------|-------------------------------|
|                                             | parvalbumin                   | 0.03         | 0.858                         | <b>0.34</b> | <b>0.041</b>                  | -0.03 | 0.876 | <b>0.34</b> | <b>0.040</b>                  |
|                                             | cholecystokinin               | -0.05        | 0.783                         | <b>0.34</b> | <b>0.037</b>                  | 0.22  | 0.188 | 0.16        | 0.332                         |
|                                             | calbindin                     | <b>-0.55</b> | <b>4.01 x 10<sup>-4</sup></b> | <b>0.45</b> | <b>0.005</b>                  | 0.09  | 0.586 | <b>0.57</b> | <b>2.08 x 10<sup>-4</sup></b> |
|                                             | vasoactive intestinal peptide | -0.24        | 0.157                         | 0.29        | 0.084                         | 0.02  | 0.902 | <b>0.38</b> | <b>0.022</b>                  |
|                                             | somatostatin                  | <b>-0.38</b> | <b>0.020</b>                  | <b>0.63</b> | <b>2.86 x 10<sup>-5</sup></b> | 0.15  | 0.375 | <b>0.44</b> | <b>6.06 x 10<sup>-3</sup></b> |
|                                             | calretinin                    | -0.15        | 0.366                         | 0.00        | 0.978                         | 0.18  | 0.289 | 0.16        | 0.334                         |
|                                             | neuropeptide Y                | -0.25        | 0.136                         | <b>0.58</b> | <b>1.53 x 10<sup>-4</sup></b> | -0.05 | 0.769 | <b>0.51</b> | <b>1.31 x 10<sup>-3</sup></b> |
| <b>mRNA</b>                                 | <b>whole cohort</b>           |              |                               |             |                               |       |       |             |                               |
| (group outliers >2SD from the mean removed) | parvalbumin                   | -0.13        | 0.302                         | <b>0.28</b> | <b>0.022</b>                  | 0.01  | 0.924 | 0.15        | 0.222                         |
|                                             | cholecystokinin               | -0.17        | 0.152                         | 0.18        | 0.140                         | 0.00  | 0.976 | -0.07       | 0.552                         |
|                                             | calbindin                     | <b>-0.57</b> | <b>1.99 x 10<sup>-7</sup></b> | <b>0.38</b> | <b>9.59 x 10<sup>-4</sup></b> | 0.04  | 0.743 | <b>0.54</b> | <b>7.71 x 10<sup>-7</sup></b> |
|                                             | vasoactive intestinal peptide | <b>-0.34</b> | <b>4.06 x 10<sup>-3</sup></b> | 0.12        | 0.319                         | -0.10 | 0.430 | <b>0.36</b> | <b>1.97 x 10<sup>-3</sup></b> |
|                                             | somatostatin                  | <b>-0.46</b> | <b>4.63 x 10<sup>-5</sup></b> | <b>0.62</b> | <b>6.18 x 10<sup>-9</sup></b> | 0.09  | 0.443 | <b>0.33</b> | <b>5.64 x 10<sup>-3</sup></b> |
|                                             | calretinin                    | -0.18        | 0.138                         | -0.01       | 0.919                         | -0.03 | 0.774 | 0.16        | 0.191                         |
|                                             | neuropeptide Y                | <b>-0.30</b> | <b>9.43 x 10<sup>-3</sup></b> | <b>0.64</b> | <b>1.36 x 10<sup>-9</sup></b> | -0.02 | 0.898 | <b>0.40</b> | <b>5.54 x 10<sup>-4</sup></b> |
| <b>controls</b>                             |                               |              |                               |             |                               |       |       |             |                               |
|                                             | parvalbumin                   | -0.33        | 0.058                         | 0.11        | 0.542                         | 0.14  | 0.427 | -0.10       | 0.573                         |
|                                             | cholecystokinin               | -0.31        | 0.063                         | 0.15        | 0.377                         | -0.03 | 0.871 | -0.22       | 0.201                         |
|                                             | calbindin                     | <b>-0.66</b> | <b>1.36 x 10<sup>-5</sup></b> | 0.27        | 0.105                         | 0.02  | 0.897 | <b>0.52</b> | <b>1.08 x 10<sup>-3</sup></b> |
|                                             | vasoactive intestinal peptide | <b>-0.40</b> | <b>0.017</b>                  | -0.10       | 0.583                         | -0.08 | 0.630 | 0.33        | 0.051                         |
|                                             | somatostatin                  | <b>-0.64</b> | <b>2.72 x 10<sup>-5</sup></b> | <b>0.57</b> | <b>2.70 x 10<sup>-4</sup></b> | 0.17  | 0.327 | 0.18        | 0.290                         |
|                                             | calretinin                    | -0.23        | 0.180                         | -0.14       | 0.415                         | -0.16 | 0.356 | 0.14        | 0.418                         |
|                                             | neuropeptide Y                | -0.27        | 0.103                         | <b>0.63</b> | <b>3.37 x 10<sup>-5</sup></b> | 0.04  | 0.794 | 0.22        | 0.193                         |

| <b>schizophrenics</b> |                               |              |                               |             |                               |       |       |             |                               |
|-----------------------|-------------------------------|--------------|-------------------------------|-------------|-------------------------------|-------|-------|-------------|-------------------------------|
|                       | parvalbumin                   | 0.10         | 0.582                         | <b>0.40</b> | <b>0.018</b>                  | 0.00  | 0.978 | <b>0.43</b> | <b>0.012</b>                  |
|                       | cholecystokinin               | -0.05        | 0.783                         | 0.18        | 0.293                         | 0.13  | 0.463 | 0.07        | 0.692                         |
|                       | calbindin                     | <b>-0.50</b> | <b>1.73 x 10<sup>-3</sup></b> | <b>0.51</b> | <b>1.49 x 10<sup>-3</sup></b> | 0.01  | 0.943 | <b>0.60</b> | <b>1.2 x 10<sup>-5</sup></b>  |
|                       | vasoactive intestinal peptide | -0.30        | 0.083                         | 0.24        | 0.160                         | -0.02 | 0.909 | <b>0.40</b> | <b>0.018</b>                  |
|                       | somatostatin                  | <b>-0.33</b> | <b>0.052</b>                  | <b>0.71</b> | <b>1.45 x 10<sup>-6</sup></b> | 0.19  | 0.284 | <b>0.52</b> | <b>1.31 x 10<sup>-3</sup></b> |
|                       | calretinin                    | -0.12        | 0.485                         | 0.11        | 0.540                         | 0.16  | 0.353 | 0.18        | 0.305                         |
|                       | neuropeptide Y                | <b>-0.37</b> | <b>0.028</b>                  | <b>0.67</b> | <b>1.10 x 10<sup>-5</sup></b> | 0.01  | 0.960 | <b>0.63</b> | <b>5.90 x 10<sup>-5</sup></b> |
| <b>protein</b>        | <b>whole cohort</b>           |              |                               |             |                               |       |       |             |                               |
| (outliers removed)    |                               |              |                               |             |                               |       |       |             |                               |
|                       | calretinin                    | 0.11         | 0.363                         | -0.05       | 0.654                         | -0.06 | 0.646 | 0.09        | 0.456                         |
|                       | <b>controls</b>               |              |                               |             |                               |       |       |             |                               |
|                       | calretinin                    | -0.09        | 0.577                         | 0.02        | 0.904                         | -0.12 | 0.482 | <b>0.41</b> | <b>0.012</b>                  |
|                       | <b>schizophrenics</b>         |              |                               |             |                               |       |       |             |                               |
|                       | calretinin                    | -0.22        | 0.199                         | 0.11        | 0.513                         | 0.04  | 0.819 | 0.15        | 0.367                         |

**FIGURE S1. Expression of housekeeping gene transcripts and geometric mean is not altered across development.**

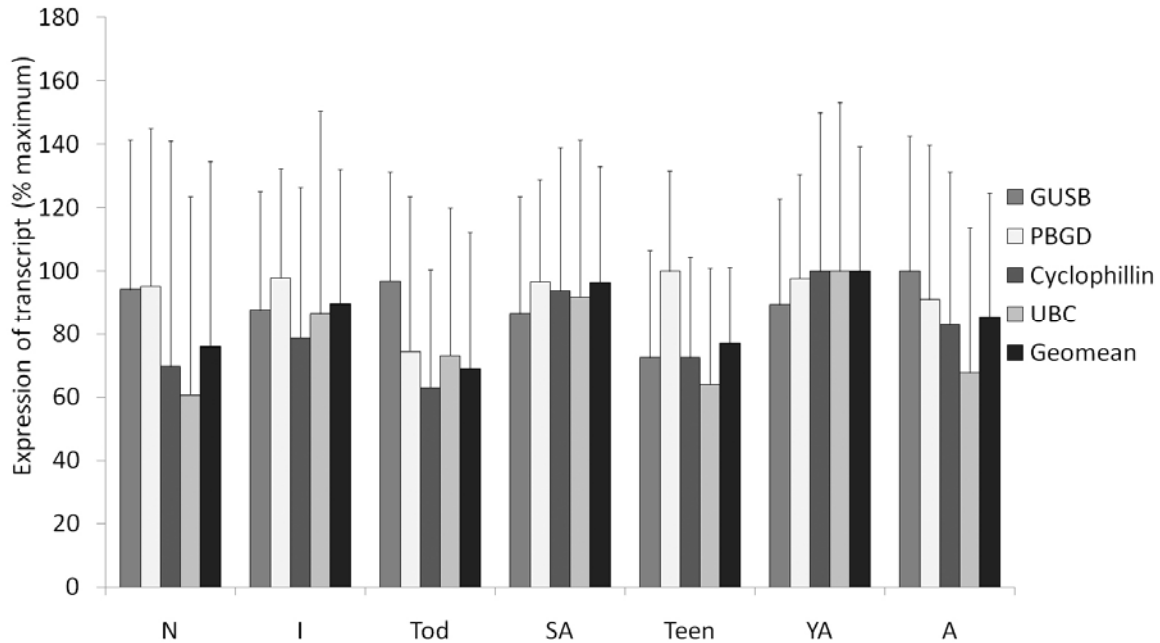

The expression of four housekeeping genes (glucuronidase,  $\beta$  (GUSB), hydroxymethylbilane synthase (PBGD), peptidylprolyl isomerase A (cyclophilin) and ubiquitin C (UBC) was measured in each developmental sample. These genes were used to determine the geometric mean (Geomean) that was used to normalize expression of target transcripts. The housekeeping genes and Geomean showed no significant difference in expression across development by one way ANOVA. N=neonate; I=infant; Tod=toddler; SA=school age; Teen=teenage; YA=young adult; A=adult. Error bars represent standard deviation.

**TABLE S5. Correlation of gene expression with clinical characteristics in schizophrenia with group outliers >2SD from the mean removed**

|                                                            |                               | age of onset               |       | duration of illness |                               | daily mean chlor           |       | last recorded chlor |       | lifetime chlor |       |
|------------------------------------------------------------|-------------------------------|----------------------------|-------|---------------------|-------------------------------|----------------------------|-------|---------------------|-------|----------------|-------|
|                                                            |                               | r                          | p     | r                   | p                             | r                          | p     | r                   | p     | r              | p     |
| <b>mRNA</b><br>(group outliers included)                   | parvalbumin                   | (-)1.22 x 10 <sup>-3</sup> | 0.994 | 0.03                | 0.853                         | (-)4.86 x 10 <sup>-3</sup> | 0.977 | 0.06                | 0.721 | -0.03          | 0.865 |
|                                                            | cholecystokinin               | 0.05                       | 0.756 | -0.07               | 0.675                         | 0.11                       | 0.515 | -0.26               | 0.146 | 0.04           | 0.799 |
|                                                            | calbindin                     | -0.15                      | 0.380 | <b>-0.50</b>        | <b>0.002</b>                  | -0.02                      | 0.928 | -0.25               | 0.166 | -0.15          | 0.390 |
|                                                            | vasoactive intestinal peptide | -0.15                      | 0.381 | -0.18               | 0.292                         | -0.07                      | 0.670 | -0.11               | 0.536 | -0.15          | 0.373 |
|                                                            | somatostatin                  | -0.14                      | 0.411 | <b>-0.33</b>        | <b>0.047</b>                  | -0.26                      | 0.115 | -0.17               | 0.332 | -0.28          | 0.098 |
|                                                            | calretinin                    | -0.29                      | 0.081 | -0.03               | 0.866                         | 0.26                       | 0.116 | -0.06               | 0.738 | 0.17           | 0.322 |
|                                                            | neuropeptide Y                | -0.04                      | 0.792 | -0.24               | 0.160                         | -0.22                      | 0.193 | -0.04               | 0.816 | -0.22          | 0.187 |
| <b>mRNA</b><br>(group outliers >2SD from the mean removed) | parvalbumin                   | 0.06                       | 0.743 | 0.07                | 0.676                         | 0.05                       | 0.795 | -0.06               | 0.751 | 0.05           | 0.780 |
|                                                            | cholecystokinin               | 0.02                       | 0.915 | -0.06               | 0.741                         | 0.13                       | 0.451 | -0.35               | 0.052 | 0.06           | 0.750 |
|                                                            | calbindin                     | -0.18                      | 0.283 | <b>-0.43</b>        | <b>8.73 x 10<sup>-3</sup></b> | 0.11                       | 0.541 | -0.19               | 0.304 | -0.05          | 0.763 |
|                                                            | vasoactive intestinal peptide | -0.10                      | 0.560 | -0.26               | 0.135                         | -0.08                      | 0.654 | -0.31               | 0.088 | -0.16          | 0.371 |
|                                                            | somatostatin                  | -0.26                      | 0.139 | -0.23               | 0.187                         | -0.23                      | 0.189 | -0.14               | 0.457 | -0.22          | 0.205 |
|                                                            | calretinin                    | -0.20                      | 0.255 | -0.04               | 0.822                         | 0.29                       | 0.092 | -0.19               | 0.300 | 0.21           | 0.223 |
|                                                            | neuropeptide Y                | -0.06                      | 0.715 | <b>-0.36</b>        | <b>0.035</b>                  | -0.23                      | 0.179 | -0.01               | 0.975 | -0.26          | 0.135 |
| <b>protein</b>                                             | calretinin                    | 0.02                       | 0.915 | 0.22                | 0.213                         | 0.05                       | 0.763 | 0.20                | 0.270 | 0.11           | 0.532 |

chlor=chlorpromazine equivalent
